# Supplementary material
Source: ML conference proceedings conference paper supplement (https://openaccess.thecvf.com/content/CVPR2023/html/Zhou_Efficient_Second-Order_Plane_CVPR_2023_paper.html)
Supplement: Supplementary file 1 [file Zhou_Efficient_Second-Order_Plane_CVPR_2023_supplemental.pdf]

# Supplementary Material for Efficient Second-Order Plane Adjustment

Lipu Zhou  
Meituan, Beijing, China  
zhoulipu@meituan.com

## 1. Introduction

This document provides the following contents:

- A brief introduction to the implicit function theorem which was used to derive Lemma 1.
- The proof of Lemma 1.
- The proof of Lemma 2.
- The proof of Theorem 1.
- The proof of Lemma 3.
- The proof of Theorem 2.
- The partial derivatives of entries in  $\mathbf{M}_i$ .

## 2. Implicit Function Theorem

Here we introduce the implicit function theorem [1]. We used it to derive Lemma 1.

**Implicit Function Theorem** *Let  $\mathbf{f} : \mathbb{R}^{n+m} \rightarrow \mathbb{R}^m$  be a continuously differentiable function, and let  $\mathbb{R}^{n+m}$  have coordinates  $[\mathbf{x}, \mathbf{y}]$ . Fix a point  $[\mathbf{a}, \mathbf{b}] = [a_1, \dots, a_n, b_1, \dots, b_m]$  with  $\mathbf{f}(\mathbf{a}, \mathbf{b}) = \mathbf{0}$ , where  $\mathbf{0} \in \mathbb{R}^m$  is the zero vector. If the Jacobian matrix of  $\mathbf{f}$  with respect to  $\mathbf{y}$  is invertible at  $[\mathbf{a}, \mathbf{b}]$ , then there exists an open set  $\mathbb{U} \subset \mathbb{R}^n$  containing  $\mathbf{a}$  such that there exists a unique continuously differentiable function  $\mathbf{g} : \mathbb{U} \rightarrow \mathbb{R}^m$  such that  $\mathbf{g}(\mathbf{a}) = \mathbf{b}$ , and  $\mathbf{f}(\mathbf{x}, \mathbf{g}(\mathbf{x})) = \mathbf{0}$  for all  $\mathbf{x} \in \mathbb{U}$ . Moreover, the Jacobian matrix of  $\mathbf{g}$  in  $\mathbb{U}$  with respect to  $\mathbf{x}$  is given by the matrix product:*

$$\frac{\partial \mathbf{g}}{\partial \mathbf{x}}(\mathbf{x}) = -\mathbf{J}_{\mathbf{f}, \mathbf{y}}(\mathbf{x}, \mathbf{g}(\mathbf{x}))^{-1} \mathbf{J}_{\mathbf{f}, \mathbf{x}}(\mathbf{x}, \mathbf{g}(\mathbf{x})) \quad (1)$$

where  $\mathbf{J}_{\mathbf{f}, \mathbf{y}}(\mathbf{x}, \mathbf{g}(\mathbf{x}))$  is the Jacobian matrix of  $\mathbf{f}$  with respect to  $\mathbf{y}$  at  $[\mathbf{x}, \mathbf{g}(\mathbf{x})]$ , and  $\mathbf{J}_{\mathbf{f}, \mathbf{x}}(\mathbf{x}, \mathbf{g}(\mathbf{x}))$  is the Jacobian matrix of  $\mathbf{f}$  with respect to  $\mathbf{x}$  at  $[\mathbf{x}, \mathbf{g}(\mathbf{x})]$ .

From the implicit function theorem, we know that we can get  $\frac{\partial \mathbf{g}}{\partial \mathbf{x}}(\mathbf{x})$  without knowing the exact form of  $\mathbf{g}(\mathbf{x})$ .

## 3. Proof of Lemma 1

$\lambda_{i,3}$  is the smallest root of

$$-\lambda_{i,3}^3 + a_i \lambda_{i,3}^2 + b_i \lambda_{i,3} + c_i = 0. \quad (2)$$

Let us define

$$\boldsymbol{\chi}_i = \begin{bmatrix} \lambda_{i,3}^2 \\ \lambda_{i,3} \\ 1 \end{bmatrix}, \boldsymbol{\eta}_i = \begin{bmatrix} a_i \\ b_i \\ c_i \end{bmatrix}, \boldsymbol{\kappa}_i = \begin{bmatrix} -3 \\ 2a_i \\ b_i \end{bmatrix}, \boldsymbol{\delta}_{jm}^i = \frac{\partial \boldsymbol{\eta}_i}{\partial x_{jm}} \quad (3)$$

Suppose that  $\boldsymbol{\pi}_i$  is observed at  $\mathbf{x}_j$ , as demonstrated in Fig. 1. Assume  $x_{jm}$  is the  $m$ th element of  $\mathbf{x}_j$ . The following lemma provides the formula of  $\frac{\partial \lambda_{i,3}}{\partial x_{jm}}$ .

**Lemma 1.** *Using the notations in (3), we have*

$$\frac{\partial \lambda_{i,3}}{\partial x_{jm}} = -\boldsymbol{\varphi}_i \boldsymbol{\delta}_{jm}^i \cdot \boldsymbol{\chi}_i, \quad (4)$$

where  $\cdot$  represents the dot product and  $\boldsymbol{\varphi}_i = (\boldsymbol{\kappa}_i \cdot \boldsymbol{\chi}_i)^{-1}$  and  $\boldsymbol{\delta}_{jm}^i = \frac{\partial \boldsymbol{\eta}_i}{\partial x_{jm}}$ .

*Proof.*  $a_i, b_i, c_i$  are functions of poses in  $\mathbb{X}_i$ . Here we only consider one variable  $x_{jm}$  of  $\mathbf{x}_j$  (i.e., the  $m$ th entry of  $\mathbf{x}_j \in \mathbb{X}_i$ ). To compute  $\frac{\partial \lambda_{i,3}}{\partial x_{jm}}$ , we treat  $x_{jm}$  as the only unknown and other variables in  $\mathbb{X}_i$  as constants. Thus,  $a_i, b_i, c_i$  are functions of  $x_{jm}$ . Then, we define

$$f(x_{jm}, \lambda_{i,3}) = -\lambda_{i,3}^3 + a_i \lambda_{i,3}^2 + b_i \lambda_{i,3} + c_i. \quad (5)$$

Then we have

$$\begin{aligned} \frac{\partial f}{\partial \lambda_{i,3}} &= -3\lambda_{i,3}^2 + 2a_i \lambda_{i,3} + b_i, \\ \frac{\partial f}{\partial x_{jm}} &= \lambda_{i,3}^2 \frac{\partial a_i}{\partial x_{jm}} + \lambda_{i,3} \frac{\partial b_i}{\partial x_{jm}} + \frac{\partial c_i}{\partial x_{jm}}. \end{aligned} \quad (6)$$

According to the definition of  $\boldsymbol{\delta}_{jm}^i$  in (4), it has the form

$$\boldsymbol{\delta}_{jm}^i = \frac{\partial \boldsymbol{\eta}_i}{\partial x_{jm}} = \begin{bmatrix} \frac{\partial a_i}{\partial x_{jm}} \\ \frac{\partial b_i}{\partial x_{jm}} \\ \frac{\partial c_i}{\partial x_{jm}} \end{bmatrix} \quad (7)$$

Substituting the definitions of  $\varphi_i$ ,  $\chi_i$ ,  $\kappa_i$ , and  $\delta_{jm}$  into (6), we have

$$\begin{aligned} \frac{\partial f}{\partial \lambda_{i,3}} &= \kappa_i \cdot \chi_i = \varphi_i^{-1}, \\ \frac{\partial f}{\partial x_{jm}} &= \delta_{jm} \cdot \chi_i. \end{aligned} \quad (8)$$

Using the implicit function theorem, for  $f(x_{jm}, \lambda_{i,3}) = 0$ , we have

$$\frac{\partial \lambda_{i,3}}{\partial x_{jm}} = -\frac{\frac{\partial f}{\partial x_{jm}}}{\frac{\partial f}{\partial \lambda_{i,3}}} \quad (9)$$

Substituting (8) into (9), we finally get

$$\frac{\partial \lambda_{i,3}}{\partial x_{jm}} = -\varphi_i \delta_{jm}^i \cdot \chi_i. \quad (10)$$

□

## 4. Proof of Lemma 2

Suppose that  $\pi_i$  is observed at  $\mathbf{x}_j$  and  $\mathbf{x}_k$ , as demonstrated in Fig. 1. Assume  $x_{jm}$  is the  $m$ th element of  $\mathbf{x}_j$ , and  $x_{kn}$  is the  $n$ th element of  $\mathbf{x}_k$ . The following lemma provides the formula of  $\frac{\partial^2 \lambda_{i,3}}{\partial x_{jm} \partial x_{kn}}$ .

**Lemma 2.** *Using notations in (3) and (4), we have*

$$\frac{\partial^2 \lambda_{i,3}}{\partial x_{jm} \partial x_{kn}} = -\varphi_i \left( \delta_{jm}^i \cdot \frac{\partial \chi_i}{\partial x_{kn}} + \chi_i \cdot \frac{\partial \delta_{jm}^i}{\partial x_{kn}} - \frac{\partial \lambda_{i,3}}{\partial x_{jm}} \frac{\partial \varphi_i^{-1}}{\partial x_{kn}} \right). \quad (11)$$

*Proof.* We first compute the partial derivative of  $\frac{\partial \lambda_{i,3}}{\partial x_{jm}}$  in (4) with respect to  $x_{kn}$ . According to the production rule of calculus, we have

$$\frac{\partial^2 \lambda_{i,3}}{\partial x_{jm} \partial x_{kn}} = -\varphi_i \delta_{jm}^i \cdot \frac{\partial \chi_i}{\partial x_{kn}} - \varphi_i \chi_i \cdot \frac{\partial \delta_{jm}^i}{\partial x_{kn}} - \delta_{jm}^i \cdot \chi_i \cdot \frac{\partial \varphi_i}{\partial x_{kn}}. \quad (12)$$

Let us first focus on the term  $\frac{\partial \varphi_i}{\partial x_{kn}}$  in (12). As  $\varphi_i = (\kappa_i \cdot \chi_i)^{-1}$ , we have

$$\frac{\partial \varphi_i}{\partial x_{kn}} = -(\kappa_i \cdot \chi_i)^{-2} \frac{\partial (\kappa_i \cdot \chi_i)}{\partial x_{kn}} = -\varphi_i^2 \frac{\partial \varphi_i^{-1}}{\partial x_{kn}}. \quad (13)$$

Now let us consider  $\delta_{jm}^i \cdot \chi_i \frac{\partial \varphi_i}{\partial x_{kn}}$  that is the third term in (12). Using (13), we have

$$\begin{aligned} \delta_{jm}^i \cdot \chi_i \frac{\partial \varphi_i}{\partial x_{kn}} &= -\delta_{jm}^i \cdot \chi_i \varphi_i^2 \frac{\partial \varphi_i^{-1}}{\partial x_{kn}} \\ &= -\varphi_i \underbrace{(\varphi_i \delta_{jm}^i \cdot \chi_i)}_{\frac{\partial \lambda_{i,3}}{\partial x_{jm}}} \frac{\partial \varphi_i^{-1}}{\partial x_{kn}} \\ &= -\varphi_i \frac{\partial \lambda_{i,3}}{\partial x_{jm}} \frac{\partial \varphi_i^{-1}}{\partial x_{kn}} \end{aligned} \quad (14)$$

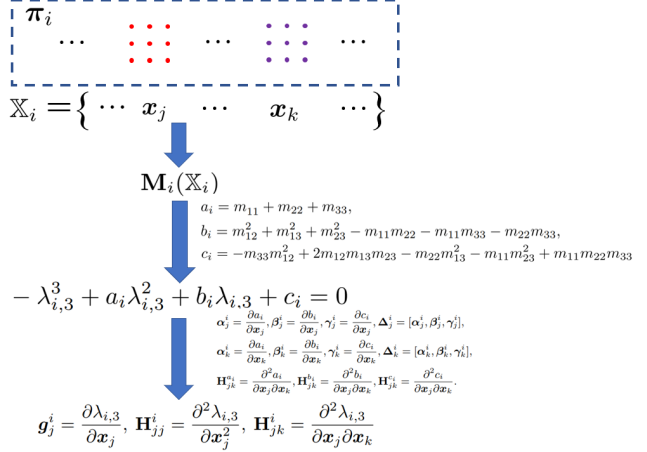

Figure 1. Summary of our algorithm.  $\mathbb{X}_i$  is the set of poses which can see  $\pi_i$ . Here  $\mathbf{x}_j \in \mathbb{X}_i$  and  $\mathbf{x}_k \in \mathbb{X}_i$ . The key point of our algorithm is to get  $\mathbf{g}_j^i = \frac{\partial \lambda_{i,3}}{\partial x_j}$ ,  $\mathbf{H}_{jj}^i = \frac{\partial^2 \lambda_{i,3}}{\partial x_j^2}$ , and  $\mathbf{H}_{jk}^i = \frac{\partial^2 \lambda_{i,3}}{\partial x_j \partial x_k}$ . Theorem 1 provides their formulas. From Theorem 1, we know that the partial derivatives of  $a_i$ ,  $b_i$ , and  $c_i$  with respect to  $\mathbf{x}_j$  and  $\mathbf{x}_k$  in (16) are crucial. As  $a_i$ ,  $b_i$ , and  $c_i$  are polynomials with respect to  $m_{ef}$  ( $e = 1, 2, 3$  and  $f = 1, 2, 3$ ), to get the partial derivatives of  $a_i$ ,  $b_i$ , and  $c_i$  with respect to  $\mathbf{x}_j$  and  $\mathbf{x}_k$ , we need to compute the partial derivatives of  $m_{ef}$  with respect to  $\mathbf{x}_j$  and  $\mathbf{x}_k$ . Section 8 proves these partial derivatives of  $m_{ef}$ .

Substituting (14) into (12), we have

$$\begin{aligned} \frac{\partial^2 \lambda_{i,3}}{\partial x_{jm} \partial x_{kn}} &= -\varphi_i \delta_{jm}^i \cdot \frac{\partial \chi_i}{\partial x_{kn}} - \varphi_i \chi_i \cdot \frac{\partial \delta_{jm}^i}{\partial x_{kn}} + \varphi_i \frac{\partial \lambda_{i,3}}{\partial x_{jm}} \frac{\partial \varphi_i^{-1}}{\partial x_{kn}} \\ &= -\varphi_i \left( \delta_{jm}^i \cdot \frac{\partial \chi_i}{\partial x_{kn}} + \chi_i \cdot \frac{\partial \delta_{jm}^i}{\partial x_{kn}} - \frac{\partial \lambda_{i,3}}{\partial x_{jm}} \frac{\partial \varphi_i^{-1}}{\partial x_{kn}} \right) \end{aligned} \quad (15)$$

□

## 5. Proof of Theorem 1

Let us define

$$\begin{aligned} \alpha_j^i &= \frac{\partial a_i}{\partial x_j}, \beta_j^i = \frac{\partial b_i}{\partial x_j}, \gamma_j^i = \frac{\partial c_i}{\partial x_j}, \Delta_j^i = [\alpha_j^i, \beta_j^i, \gamma_j^i], \\ \alpha_k^i &= \frac{\partial a_i}{\partial x_k}, \beta_k^i = \frac{\partial b_i}{\partial x_k}, \gamma_k^i = \frac{\partial c_i}{\partial x_k}, \Delta_k^i = [\alpha_k^i, \beta_k^i, \gamma_k^i], \\ \mathbf{H}_{jk}^{a_i} &= \frac{\partial^2 a_i}{\partial x_j \partial x_k}, \mathbf{H}_{jk}^{b_i} = \frac{\partial^2 b_i}{\partial x_j \partial x_k}, \mathbf{H}_{jk}^{c_i} = \frac{\partial^2 c_i}{\partial x_j \partial x_k}. \end{aligned} \quad (16)$$

Using the above lemmas and notations, we can derive  $\mathbf{g}_j^i$  and  $\mathbf{H}_{jk}^i$ .

**Theorem 1.** *Using the notations in (3), (4) and (16),  $\mathbf{g}_j^i$  and  $\mathbf{H}_{jk}^i$  have the forms*

$$\begin{aligned} \mathbf{g}_j^i &= -\varphi_i \Delta_j^i \chi_i, \\ \mathbf{H}_{jk}^i &= \varphi_i \left( \mathbf{K}_{jk}^i - \lambda_{3,i}^2 \mathbf{H}_{jk}^{a_i} - \lambda_{3,i} \mathbf{H}_{jk}^{b_i} - \mathbf{H}_{jk}^{c_i} \right), \end{aligned} \quad (17)$$

where  $\mathbf{K}_{jk}^i = \mathbf{g}_j^i \mathbf{u}^T - \mathbf{v}(\mathbf{g}_k^i)^T$ ,  $\mathbf{u} = 2\lambda_{i,3}\boldsymbol{\alpha}_k^i + \boldsymbol{\beta}_k^i + (2a - 6\lambda_{i,3})\mathbf{g}_k^i$ , and  $\mathbf{v} = 2\lambda_{i,3}\boldsymbol{\alpha}_j^i + \boldsymbol{\beta}_j^i$ , and similar to  $\mathbf{g}_j^i$ ,  $\mathbf{g}_k^i = -\varphi_i \boldsymbol{\Delta}_k^i \boldsymbol{\chi}_i$  is the gradient block for  $\mathbf{x}_k$ .

*Proof.* Expanding the definition of  $\boldsymbol{\Delta}_j^i$  in (16), we have

$$\boldsymbol{\Delta}_j^i = \begin{bmatrix} \frac{\partial a_i}{\partial x_{j1}} & \frac{\partial b_i}{\partial x_{j1}} & \frac{\partial c_i}{\partial x_{j1}} \\ \vdots & \vdots & \vdots \\ \frac{\partial a_i}{\partial x_{jm}} & \frac{\partial b_i}{\partial x_{jm}} & \frac{\partial c_i}{\partial x_{jm}} \\ \vdots & \vdots & \vdots \\ \frac{\partial a_i}{\partial x_{j6}} & \frac{\partial b_i}{\partial x_{j6}} & \frac{\partial c_i}{\partial x_{j6}} \end{bmatrix} \in \mathbb{R}^{6 \times 6} \quad (18)$$

Substituting the definition of  $\boldsymbol{\delta}_{jm}^i$  in (7) into (18), we can write  $\boldsymbol{\Delta}_j^i$  as

$$\boldsymbol{\Delta}_j^i = \begin{bmatrix} \boldsymbol{\delta}_{j1}^i{}^T \\ \vdots \\ \boldsymbol{\delta}_{jm}^i{}^T \\ \vdots \\ \boldsymbol{\delta}_{j6}^i{}^T \end{bmatrix} \quad (19)$$

Assume  $x_{jm}$  is the  $m$ th variable of  $\mathbf{x}_j$ . Then  $\mathbf{g}_j^i$  can be written as

$$\mathbf{g}_j^i = \frac{\partial \lambda_{i,3}}{\partial \mathbf{x}_j} = \begin{bmatrix} \frac{\partial \lambda_{i,3}}{\partial x_{j1}} \\ \vdots \\ \frac{\partial \lambda_{i,3}}{\partial x_{jm}} \\ \vdots \\ \frac{\partial \lambda_{i,3}}{\partial x_{j6}} \end{bmatrix} \in \mathbb{R}^6. \quad (20)$$

Here  $\frac{\partial \lambda_{i,3}}{\partial x_{jm}}$  is the  $m$ th element of  $\mathbf{g}_j^i$ . Substituting (19) into  $\mathbf{g}_j^i$  in (17), we can obtain the formula of  $\frac{\partial \lambda_{i,3}}{\partial x_{jm}}$  as

$$\frac{\partial \lambda_{i,3}}{\partial x_{jm}} = -\varphi_i \boldsymbol{\delta}_{jm}^i{}^T \boldsymbol{\chi}_i = -\varphi_i \boldsymbol{\delta}_{jm}^i \cdot \boldsymbol{\chi}_i. \quad (21)$$

The above formula is what we proved in Lemma 1. Using Lemma 1, we know that the formula of  $\mathbf{g}_j^i$  in (17) is correct.

Now we consider the Hessian matrix. According to the definitions of  $\boldsymbol{\delta}_{kn}^i$ ,  $\boldsymbol{\chi}_i$ , and  $\boldsymbol{\delta}_{jm}^i$ , we have

$$\boldsymbol{\delta}_{kn}^i = \begin{bmatrix} \frac{\partial a_i}{\partial x_{kn}} \\ \frac{\partial b_i}{\partial x_{kn}} \\ \frac{\partial c_i}{\partial x_{kn}} \end{bmatrix}, \quad \frac{\partial \boldsymbol{\chi}_i}{\partial x_{j,m}} = \begin{bmatrix} 2\lambda_{i,3}^2 \frac{\partial \lambda_{i,3}}{\partial x_{j,m}} \\ \frac{\partial \lambda_{i,3}}{\partial x_{j,m}} \\ 0 \end{bmatrix}, \quad \frac{\partial \boldsymbol{\delta}_{jm}^i}{\partial x_{kn}} = \begin{bmatrix} \frac{\partial^2 a_i}{\partial x_{jm} \partial x_{kn}} \\ \frac{\partial^2 b_i}{\partial x_{jm} \partial x_{kn}} \\ \frac{\partial^2 c_i}{\partial x_{jm} \partial x_{kn}} \end{bmatrix} \quad (22)$$

In addition, using the definition of  $\varphi_i$  in (4), we obtain

$$\begin{aligned} \frac{\partial \varphi_i^{-1}}{\partial x_{km}} &= \boldsymbol{\chi}_i \cdot \frac{\partial \boldsymbol{\kappa}_i}{\partial x_{km}} + \boldsymbol{\kappa}_i \cdot \frac{\partial \boldsymbol{\chi}_i}{\partial x_{km}} \\ &= 2\lambda_{i,3} \frac{\partial a_i}{\partial x_{kn}} + \frac{\partial b_i}{\partial x_{kn}} + (2a - 6\lambda_{i,3}) \frac{\partial \lambda_{i,3}}{\partial x_{kn}} \end{aligned} \quad (23)$$

Let us denote the entry in the  $m$ th row and  $n$ th column of  $\mathbf{H}_{jk}^i$  as  $\mathbf{H}_{jk}^i(m, n)$ . Using the formula of  $\mathbf{H}_{jk}^i$  in (17) and the variables in (22) and (23), we have

$$\begin{aligned} \mathbf{H}_{jk}^i(m, n) &= -\varphi_i \underbrace{\frac{\partial \lambda_{i,3}}{\partial x_{kn}} \left( 2\lambda_{i,3} \frac{\partial a_i}{\partial x_{jm}} + \frac{\partial b_i}{\partial x_{jm}} \right)}_{\varphi_i \boldsymbol{\delta}_{kn}^i \cdot \frac{\partial \boldsymbol{\chi}_i}{\partial x_{jm}}} - \\ &\quad \varphi_i \underbrace{\left( \lambda_{i,3}^2 \frac{\partial^2 a_i}{\partial x_{jm} \partial x_{kn}} + \lambda_{i,3} \frac{\partial^2 b_i}{\partial x_{jm} \partial x_{kn}} + \frac{\partial^2 c_i}{\partial x_{jm} \partial x_{kn}} \right)}_{\varphi_i \boldsymbol{\chi}_i \cdot \frac{\partial \boldsymbol{\delta}_{jm}^i}{\partial x_{kn}}} + \\ &\quad \varphi_i \underbrace{\frac{\partial \lambda_{i,3}}{\partial x_{jm}} \left( 2\lambda_{i,3} \frac{\partial a_i}{\partial x_{kn}} + \frac{\partial b_i}{\partial x_{kn}} + (2a - 6\lambda_{i,3}) \frac{\partial \lambda_{i,3}}{\partial x_{kn}} \right)}_{\varphi_i \frac{\partial \lambda_{i,3}}{\partial x_{jm}} \frac{\partial \varphi_i^{-1}}{\partial x_{km}}} \\ &= -\varphi_i \left( \boldsymbol{\delta}_{jm}^i \cdot \frac{\partial \boldsymbol{\chi}_i}{\partial x_{kn}} + \boldsymbol{\chi}_i \cdot \frac{\partial \boldsymbol{\delta}_{jm}^i}{\partial x_{kn}} - \frac{\partial \lambda_{i,3}}{\partial x_{jm}} \frac{\partial \varphi_i^{-1}}{\partial x_{km}} \right) \end{aligned} \quad (24)$$

On the other hand, we know

$$\mathbf{H}_{jk}^i(m, n) = \frac{\partial^2 \lambda_{i,3}}{\partial x_{jm} \partial x_{kn}}. \quad (25)$$

Comparing (11) and (24), we know that the formula of  $\mathbf{H}_{jk}^i$  in (17) is correct.  $\square$

## 6. Proof of Lemma 3

$\lambda_{i,3}$  is the smallest eigenvalue of  $\mathbf{M}_i(\mathbb{X}_i)$ :

$$\mathbf{M}_i(\mathbb{X}_i) = \sum_{j \in \text{obs}(\boldsymbol{\pi}_i)} \mathbf{S}_{ij} - N_i \bar{\mathbf{p}}_i \bar{\mathbf{p}}_i^T, \quad (26)$$

where  $\bar{\mathbf{p}}_i = \frac{1}{N_i} \sum_{j \in \text{obs}(\boldsymbol{\pi}_i)} \sum_{k=1}^{N_{ij}} \mathbf{p}_{ijk}^g$  and  $\mathbf{S}_{ij} = \sum_{k=1}^{N_{ij}} \mathbf{p}_{ijk}^g \left( \mathbf{p}_{ijk}^g \right)^T$ . Here the elements in  $\mathbf{M}_i$ ,  $\mathbf{S}_{ij}$  and  $\bar{\mathbf{p}}_i$  in (26) are all functions of the poses in  $\mathbb{X}_i$ . As  $\mathbf{p}_{ijk}^g = \mathbf{T}_j \tilde{\mathbf{p}}_{ijk}$ , we have

$$\begin{aligned} \mathbf{S}_{ij} &= \mathbf{T}_j \underbrace{\sum_{k=1}^{N_{ij}} \tilde{\mathbf{p}}_{ijk} \tilde{\mathbf{p}}_{ijk}^T}_{\mathbf{U}_{ij}} \mathbf{T}_j^T = \mathbf{T}_j \mathbf{U}_{ij} \mathbf{T}_j^T, \\ \bar{\mathbf{p}}_i &= \frac{1}{N_i} \sum_{j \in \text{obs}(\boldsymbol{\pi}_i)} \mathbf{T}_j \underbrace{\sum_{k=1}^{N_{ij}} \tilde{\mathbf{p}}_{ijk}}_{\tilde{\mathbf{p}}_{ij}} = \frac{1}{N_i} \sum_{j \in \text{obs}(\boldsymbol{\pi}_i)} \mathbf{T}_j \tilde{\mathbf{p}}_{ij}. \end{aligned} \quad (27)$$

Here  $\mathbf{U}_{ij}$  and  $\tilde{\mathbf{p}}_{ij}$  in (27) are constants.

**Lemma 3.** In terms of  $\mathbf{x}_j$  and  $\mathbf{x}_k$ ,  $\bar{\mathbf{p}}_i$  in (27) has the form

$$\bar{\mathbf{p}}_i(\mathbf{x}_j, \mathbf{x}_k) = \mathbf{T}_j \mathbf{q}_{ij} + \mathbf{T}_k \mathbf{q}_{ik} + \mathbf{c}_{ijk}, \quad (28)$$

where  $\mathbf{q}_{ij} = \frac{1}{N_i} \tilde{\mathbf{p}}_{ij}$ ,  $\mathbf{q}_{ik} = \frac{1}{N_i} \tilde{\mathbf{p}}_{ik}$ , and  $\mathbf{c}_{ijk} = \frac{1}{N_i} \sum_{n \in \mathbb{O}_{jk}} \mathbf{T}_n \tilde{\mathbf{p}}_{in}$ . Here  $\mathbb{O}_{jk} = \text{obs}(\boldsymbol{\pi}_i) - \{j, k\}$  represents the set of indexes of the poses that can observe  $\boldsymbol{\pi}_i$ , excluding the  $j$ th and  $k$ th poses.

In terms of  $\mathbf{x}_j$ ,  $\bar{\mathbf{p}}_i$  has the form

$$\bar{\mathbf{p}}_i(\mathbf{x}_j) = \mathbf{T}_j \mathbf{q}_{ij} + \mathbf{c}_{ij}, \quad (29)$$

where  $\mathbf{c}_{ij} = \mathbf{T}_k \mathbf{q}_{ik} + \mathbf{c}_{ijk}$ .

*Proof.* For  $j \in \text{obs}(\boldsymbol{\pi}_i)$  and  $k \in \text{obs}(\boldsymbol{\pi}_i)$ , we take  $\frac{1}{N_i} \mathbf{T}_j \tilde{\mathbf{p}}_{ij}$  and  $\frac{1}{N_i} \mathbf{T}_k \tilde{\mathbf{p}}_{ik}$  out the summation. Then, we can write  $\bar{\mathbf{p}}_i$  as

$$\begin{aligned} \bar{\mathbf{p}}_i(\mathbf{x}_j, \mathbf{x}_k) &= \mathbf{T}_j \underbrace{\frac{1}{N_i} \tilde{\mathbf{p}}_{ij}}_{\mathbf{q}_{ij}} + \mathbf{T}_k \underbrace{\frac{1}{N_i} \tilde{\mathbf{p}}_{ik}}_{\mathbf{q}_{ik}} + \underbrace{\frac{1}{N_i} \sum_{n \in \mathbb{O}_{jk}} \mathbf{T}_n \tilde{\mathbf{p}}_{in}}_{\mathbf{c}_{ijk}} \\ &= \mathbf{T}_j \mathbf{q}_{ij} + \mathbf{T}_k \mathbf{q}_{ik} + \mathbf{c}_{ijk}. \end{aligned} \quad (30)$$

For  $j \in \text{obs}(\boldsymbol{\pi}_i)$ , we can write (30) as

$$\begin{aligned} \bar{\mathbf{p}}_i(\mathbf{x}_j, \mathbf{x}_k) &= \mathbf{T}_j \mathbf{q}_{ij} + \underbrace{\mathbf{T}_k \mathbf{q}_{ik} + \mathbf{c}_{ijk}}_{\mathbf{c}_{ij}} \\ &= \mathbf{T}_j \mathbf{q}_{ij} + \mathbf{c}_{ij} \end{aligned} \quad (31)$$

□

## 7. Proof of Theorem 2

**Theorem 2.** In terms of  $\mathbf{x}_j$ ,  $\mathbf{M}_i$  in (26) can be written as

$$\mathbf{M}_i(\mathbf{x}_j) = \mathbf{T}_j \mathbf{Q}_j^i \mathbf{T}_j^T + \mathbf{T}_j \mathbf{K}_j^i + (\mathbf{K}_j^i)^T \mathbf{T}_j^T + \mathbf{C}_j^i, \quad (32)$$

where  $\mathbf{Q}_j^i = \mathbf{U}_{ij} - N_j \mathbf{q}_{ij} \mathbf{q}_{ij}^T$  and  $\mathbf{K}_j^i = -N_i \mathbf{q}_{ij} \mathbf{c}_{ij}^T$ . Here  $\mathbf{U}_{ij}$  and  $\mathbf{q}_{ij}$  are defined in (27) and (28), respectively.

In terms of  $\mathbf{x}_j$  and  $\mathbf{x}_k$ ,  $\mathbf{M}_i$  can be written as

$$\mathbf{M}_i(\mathbf{x}_j, \mathbf{x}_k) = \mathbf{T}_j \mathbf{O}_{jk}^i \mathbf{T}_k^T + \mathbf{T}_k (\mathbf{O}_{jk}^i)^T \mathbf{T}_j^T + \mathbf{C}_{jk}^i. \quad (33)$$

where  $\mathbf{O}_{jk}^i = -N_i \mathbf{q}_{ij} \mathbf{q}_{ik}^T$ .

*Proof.* Substituting (31) into (26) and using the formula of  $\mathbf{S}_{ij} = \mathbf{T}_j \mathbf{U} \mathbf{T}_j^T$  in (27), we have

$$\begin{aligned} \mathbf{M}_i(\mathbf{x}_i) &= \sum_{j \in \text{obs}(\boldsymbol{\pi}_i)} \mathbf{S}_{ij} - N_i (\mathbf{T}_j \mathbf{q}_{ij} + \mathbf{c}_{ij}) (\mathbf{T}_j \mathbf{q}_{ij} + \mathbf{c}_{ij})^T \\ &= \mathbf{S}_{ij} - \mathbf{T}_j \left( N_i \mathbf{q}_{ij} \mathbf{q}_{ij}^T \right) \mathbf{T}_j^T - \underbrace{\mathbf{T}_j \left( N_j \mathbf{q}_{ij} \mathbf{c}_{ij}^T \right)}_{-\mathbf{K}_j^i} - \\ &\quad \underbrace{\left( N_j \mathbf{c}_{ij} \mathbf{p}_{ij}^T \right)}_{(-\mathbf{K}_j^i)^T} \mathbf{T}_j^T + \underbrace{\sum_{\substack{n \in \text{obs}(\boldsymbol{\pi}_i) \\ n \neq j}} \mathbf{S}_{in} - N_j \mathbf{c}_{ij} \mathbf{c}_{ij}^T}_{\mathbf{C}_j^i} \\ &= \mathbf{T}_j \mathbf{U}_{ij} \mathbf{T}_j^T - \mathbf{T}_j \left( N_i \mathbf{q}_{ij} \mathbf{q}_{ij}^T \right) \mathbf{T}_j^T + \mathbf{T}_j \mathbf{K}_j^i + (\mathbf{K}_j^i)^T \mathbf{T}_j^T + \mathbf{C}_j^i \\ &= \mathbf{T}_j \underbrace{\left( \mathbf{U}_{ij} - N_j \mathbf{q}_{ij} \mathbf{q}_{ij}^T \right)}_{\mathbf{Q}_j^i} \mathbf{T}_j^T + \mathbf{T}_j \mathbf{K}_j^i + (\mathbf{K}_j^i)^T \mathbf{T}_j^T + \mathbf{C}_j^i \\ &= \mathbf{T}_j \mathbf{Q}_j^i \mathbf{T}_j^T + \mathbf{T}_j \mathbf{K}_j^i + (\mathbf{K}_j^i)^T \mathbf{T}_j^T + \mathbf{C}_j^i \end{aligned}$$

Thus we get the formula of  $\mathbf{M}_i(\mathbf{x}_j)$  in (32). Now let us prove (33). Let us define

$$\begin{aligned} \mathbf{E}_j^i &= \mathbf{T}_j \mathbf{q}_{ij} (\mathbf{T}_j \mathbf{q}_{ij} + \mathbf{c}_{ij})^T \\ \mathbf{E}_k^i &= \mathbf{T}_k \mathbf{q}_{ik} (\mathbf{T}_k \mathbf{q}_{ik} + \mathbf{c}_{ijk})^T \end{aligned} \quad (34)$$

Substituting (30) into (26), we obtain

$$\begin{aligned} \mathbf{M}_i(\mathbf{x}_j, \mathbf{x}_k) &= \mathbf{T}_j \underbrace{\left( -N \mathbf{q}_{ij} \mathbf{q}_{ik}^T \right)}_{\mathbf{O}_j^i} \mathbf{T}_k^T + \mathbf{T}_j \underbrace{\left( -N \mathbf{q}_{ik} \mathbf{q}_{ij}^T \right)}_{(\mathbf{O}_j^i)^T} \mathbf{T}_k^T + \\ &\quad \underbrace{\sum_{j \in \text{obs}(\boldsymbol{\pi}_i)} \mathbf{S}_{ij} - N_i (\mathbf{E}_j^i + \mathbf{E}_k^i + \mathbf{c}_{ijk} \bar{\mathbf{p}}_i(\mathbf{x}_j, \mathbf{x}_k)^T)}_{\mathbf{C}_{jk}^i} \\ &= \mathbf{T}_j \mathbf{O}_{jk}^i \mathbf{T}_k^T + \mathbf{T}_k (\mathbf{O}_{jk}^i)^T \mathbf{T}_j^T + \mathbf{C}_{jk}^i \end{aligned} \quad (35)$$

Thus we get the formula of  $\mathbf{M}_i(\mathbf{x}_j, \mathbf{x}_k)$  in (33). □

## 8. Partial Derivatives of Entries in $\mathbf{M}_i$

As illustrated in Fig. 1, the derivatives of  $a_i$ ,  $b_i$  and  $c_i$  in (16) are the crux to get  $\mathbf{g}_j^i$ ,  $\mathbf{H}_{jj}^i$ , and  $\mathbf{H}_{jk}^i$ . The  $a_i$ ,  $b_i$  and  $c_i$  in (2) are first-, second-, and third-order polynomials with respect to the elements in  $\mathbf{M}_i$ , respectively. Let us denote the  $e$ th row and  $f$ th column entry of  $\mathbf{M}_i$  as  $m_{ef}$ . According to the chain rule in calculus, to compute the partial derivatives in (16), we have to calculate

$$\frac{\partial m_{ef}}{\partial \mathbf{x}_j}, \frac{\partial^2 m_{ef}}{\partial \mathbf{x}_j^2}, \text{ and } \frac{\partial^2 m_{ef}}{\partial \mathbf{x}_j \partial \mathbf{x}_k}. \quad (36)$$

From our paper, we know that we only need to compute their value at  $\mathbf{x}_0 = [0; 0; 0; 0; 0]$ . Assume  $q_{ef}$ ,  $k_{ef}$ , and  $o_{ef}$  are the  $e$ th row and  $f$ th column entries of  $\mathbf{Q}_j^i$ ,  $\mathbf{K}_j^i$ , and  $\mathbf{O}_{jk}^i$ , respectively. Using Theorem 2, the values of  $\frac{\partial m_{ef}}{\partial \mathbf{x}_j}$ ,  $\frac{\partial^2 m_{ef}}{\partial \mathbf{x}_j \partial \mathbf{x}_k}$ , and  $\frac{\partial^2 m_{ef}}{\partial \mathbf{x}_j^2}$  at  $\mathbf{x}_0$  have the forms in Table 1, Table 2, and Table 3, respectively. With  $\frac{\partial m_{ef}}{\partial \mathbf{x}_j}$ ,  $\frac{\partial^2 m_{ef}}{\partial \mathbf{x}_j \partial \mathbf{x}_k}$ , and  $\frac{\partial^2 m_{ef}}{\partial \mathbf{x}_j^2}$ , it is easy to get the derivatives of  $a_i$ ,  $b_i$ , and  $c_i$  in (16).

$a_i$ ,  $b_i$ , and  $c_i$  are polynomials. Using the relationship between the monomials can simplify the computation. For instance, as shown in Fig. 1,  $m_{11}m_{22}$  is a term of  $b_i$ , and  $m_{11}m_{22}m_{33}$  is a term of  $c_i$ . As  $m_{11}m_{22}m_{33} = (m_{11}m_{22})m_{33}$ . The first- and second-order partial derivatives of  $m_{11}m_{22}$  can be used to compute the first- and second-order partial derivatives of  $m_{11}m_{22}m_{33}$ .

## References

- [1] Implicit Function Theorem. [https://en.wikipedia.org/wiki/Implicit\\_function\\_theorem.1](https://en.wikipedia.org/wiki/Implicit_function_theorem.1)

|                                                                                       |                                                                                                                                                                                                                                                                                                      |                                                                                       |                                                                                                                                                                                                                                                           |
|---------------------------------------------------------------------------------------|------------------------------------------------------------------------------------------------------------------------------------------------------------------------------------------------------------------------------------------------------------------------------------------------------|---------------------------------------------------------------------------------------|-----------------------------------------------------------------------------------------------------------------------------------------------------------------------------------------------------------------------------------------------------------|
| $\frac{\partial m_{11}}{\partial \mathbf{x}_j} \Big _{\mathbf{x}_j = \mathbf{x}_0} =$ | $\begin{bmatrix} 0 \\ -2k_{31} - 2q_{13} \\ 2k_{21} + 2q_{12} \\ -4k_{32} - 4q_{23} \\ 2k_{22} - 2k_{33} + 2q_{22} - 2q_{33} \\ 4k_{23} + 4q_{23} \\ -4k_{21} - 4q_{12} \\ 2k_{11} - 2k_{22} + 2q_{11} - 2q_{22} \\ -2k_{23} - 2q_{23} \\ 4k_{12} + 4q_{12} \\ 2k_{13} + 2q_{13} \\ 0 \end{bmatrix}$ | $\frac{\partial m_{12}}{\partial \mathbf{x}_j} \Big _{\mathbf{x}_j = \mathbf{x}_0} =$ | $\begin{bmatrix} 4k_{31} + 4q_{13} \\ 2k_{32} + 2q_{23} \\ 2k_{33} - 2k_{11} - 2q_{11} + 2q_{33} \\ 0 \\ -2k_{12} - 2q_{12} \\ -4k_{13} - 4q_{13} \\ 2k_{41} + 2q_{14} \\ k_{42} + q_{24} \\ k_{43} + q_{34} \\ 0 \\ 0 \\ 0 \\ 0 \\ 0 \\ 0 \end{bmatrix}$ |
| $\frac{\partial m_{13}}{\partial \mathbf{x}_j} \Big _{\mathbf{x}_j = \mathbf{x}_0} =$ | $\begin{bmatrix} 0 \\ k_{41} + q_{14} \\ 0 \\ 2k_{42} + 2q_{24} \\ k_{43} + q_{34} \\ 0 \end{bmatrix}$                                                                                                                                                                                               | $\frac{\partial m_{22}}{\partial \mathbf{x}_j} \Big _{\mathbf{x}_j = \mathbf{x}_0} =$ | $\begin{bmatrix} 0 \\ 0 \\ 0 \\ 0 \\ 0 \\ 0 \\ 0 \\ 0 \\ 0 \\ 0 \\ 0 \\ 0 \\ 0 \\ 0 \\ 0 \end{bmatrix}$                                                                                                                                                   |
| $\frac{\partial m_{23}}{\partial \mathbf{x}_j} \Big _{\mathbf{x}_j = \mathbf{x}_0} =$ | $\begin{bmatrix} 0 \\ k_{41} + q_{14} \\ 0 \\ 2k_{42} + 2q_{24} \\ k_{43} + q_{34} \\ 0 \end{bmatrix}$                                                                                                                                                                                               | $\frac{\partial m_{33}}{\partial \mathbf{x}_j} \Big _{\mathbf{x}_j = \mathbf{x}_0} =$ | $\begin{bmatrix} k_{41} + q_{14} \\ 0 \\ k_{42} + q_{24} \\ 2k_{43} + 2q_{34} \end{bmatrix}$                                                                                                                                                              |

Table 1.  $\frac{\partial m_{ef}}{\partial \mathbf{x}_j}$  at  $\mathbf{x}_j = \mathbf{x}_0$ .

|                                                                                                                                                         |                                                                                                                                                                                                                                              |                                                                                                                                                         |                                                                                                                                                                                                                                                                                                                              |
|---------------------------------------------------------------------------------------------------------------------------------------------------------|----------------------------------------------------------------------------------------------------------------------------------------------------------------------------------------------------------------------------------------------|---------------------------------------------------------------------------------------------------------------------------------------------------------|------------------------------------------------------------------------------------------------------------------------------------------------------------------------------------------------------------------------------------------------------------------------------------------------------------------------------|
| $\frac{\partial^2 m_{11}}{\partial \mathbf{x}_j \partial \mathbf{x}_k} \Big _{\substack{\mathbf{x}_j = \mathbf{x}_0 \\ \mathbf{x}_k = \mathbf{x}_0}} =$ | $\begin{bmatrix} 0 & 0 & 0 & 0 & 0 & 0 \\ 0 & 8o_{33} & -8o_{32} & 4o_{34} & 0 & 0 \\ 0 & -8o_{23} & 8o_{22} & -4o_{24} & 0 & 0 \\ 0 & 4o_{43} & -4o_{42} & 2o_{44} & 0 & 0 \\ 0 & 0 & 0 & 0 & 0 & 0 \\ 0 & 0 & 0 & 0 & 0 & 0 \end{bmatrix}$ | $\frac{\partial^2 m_{13}}{\partial \mathbf{x}_j \partial \mathbf{x}_k} \Big _{\substack{\mathbf{x}_j = \mathbf{x}_0 \\ \mathbf{x}_k = \mathbf{x}_0}} =$ | $\begin{bmatrix} 0 & 4o_{23} & -4o_{22} & 2o_{24} & 0 & 0 \\ 4o_{32} & -4o_{13} - 4o_{31} & 4o_{12} & -2o_{14} & 0 & 2o_{34} \\ -4o_{22} & 4o_{21} & 0 & 0 & 0 & -2o_{24} \\ 2o_{42} & -2o_{41} & 0 & 0 & 0 & o_{44} \\ 0 & 0 & 0 & 0 & 0 & 0 \\ 0 & 2o_{43} & -2o_{42} & o_{44} & 0 & 0 \end{bmatrix}$                      |
| $\frac{\partial^2 m_{22}}{\partial \mathbf{x}_j \partial \mathbf{x}_k} \Big _{\substack{\mathbf{x}_j = \mathbf{x}_0 \\ \mathbf{x}_k = \mathbf{x}_0}} =$ | $\begin{bmatrix} 8o_{33} & 0 & -8o_{31} & 0 & -4o_{34} & 0 \\ 0 & 0 & 0 & 0 & 0 & 0 \\ -8o_{13} & 0 & 8o_{11} & 0 & 4o_{14} & 0 \\ 0 & 0 & 0 & 0 & 0 & 0 \\ -4o_{43} & 0 & 4o_{41} & 0 & 2o_{44} & 0 \\ 0 & 0 & 0 & 0 & 0 & 0 \end{bmatrix}$ | $\frac{\partial^2 m_{12}}{\partial \mathbf{x}_j \partial \mathbf{x}_k} \Big _{\substack{\mathbf{x}_j = \mathbf{x}_0 \\ \mathbf{x}_k = \mathbf{x}_0}} =$ | $\begin{bmatrix} 0 & -4o_{33} & 4o_{32} & -2o_{34} & 0 & 0 \\ -4o_{33} & 0 & 4o_{31} & 0 & 2o_{34} & 0 \\ 4o_{23} & 4o_{13} & -4o_{12} - 4o_{21} & 2o_{14} & -2o_{24} & 0 \\ -2o_{43} & 0 & 2o_{41} & 0 & o_{44} & 0 \\ 0 & 2o_{43} & -2o_{42} & o_{44} & 0 & 0 \\ 0 & 0 & 0 & 0 & 0 & 0 \end{bmatrix}$                      |
| $\frac{\partial^2 m_{33}}{\partial \mathbf{x}_j \partial \mathbf{x}_k} \Big _{\substack{\mathbf{x}_j = \mathbf{x}_0 \\ \mathbf{x}_k = \mathbf{x}_0}} =$ | $\begin{bmatrix} 8o_{22} & -8o_{21} & 0 & 0 & 0 & 4o_{24} \\ -8o_{12} & 8o_{11} & 0 & 0 & 0 & -4o_{14} \\ 0 & 0 & 0 & 0 & 0 & 0 \\ 0 & 0 & 0 & 0 & 0 & 0 \\ 0 & 0 & 0 & 0 & 0 & 0 \\ 4o_{42} & -4o_{41} & 0 & 0 & 0 & 2o_{44} \end{bmatrix}$ | $\frac{\partial^2 m_{23}}{\partial \mathbf{x}_j \partial \mathbf{x}_k} \Big _{\substack{\mathbf{x}_j = \mathbf{x}_0 \\ \mathbf{x}_k = \mathbf{x}_0}} =$ | $\begin{bmatrix} -4o_{23} & -4o_{32} & 4o_{31} & 4o_{21} & 0 & 2o_{24} & -2o_{34} \\ 4o_{13} & 0 & -4o_{11} & 0 & -2o_{14} & 0 & 0 \\ 4o_{12} & -4o_{11} & 0 & 0 & 0 & 2o_{14} & 0 \\ 0 & 0 & 0 & 0 & 0 & 0 & 0 \\ 2o_{42} & -2o_{41} & 0 & 0 & 0 & o_{44} & 0 \\ -2o_{43} & 0 & 2o_{41} & 0 & o_{44} & 0 & 0 \end{bmatrix}$ |

Table 2.  $\frac{\partial^2 m_{ef}}{\partial \mathbf{x}_j \partial \mathbf{x}_k}$  at  $\mathbf{x}_j = \mathbf{x}_0$  and  $\mathbf{x}_k = \mathbf{x}_0$ .

|                                                                                         |   |                                                                                                                                                                                                                                                                                                                                                                                                                                                                                  |
|-----------------------------------------------------------------------------------------|---|----------------------------------------------------------------------------------------------------------------------------------------------------------------------------------------------------------------------------------------------------------------------------------------------------------------------------------------------------------------------------------------------------------------------------------------------------------------------------------|
| $\frac{\partial^2 m_{11}}{\partial \mathbf{x}_j^2} \Big _{\mathbf{x}_j = \mathbf{x}_0}$ | = | $\begin{bmatrix} 0 & 4k_{21} + 4q_{12} & 4k_{31} + 4q_{13} & 0 & 0 & 0 \\ 4k_{21} + 4q_{12} & 8q_{33} - 8q_{11} - 8k_{11} & -8q_{23} & 4q_{34} & 0 & 0 \\ 4k_{31} + 4q_{13} & -8q_{23} & 8q_{22} - 8q_{11} - 8k_{11} & -4q_{24} & 0 & 0 \\ 0 & 4q_{34} & -4q_{24} & 2q_{44} & 0 & 0 \\ 0 & 0 & 0 & 0 & 0 & 0 \\ 0 & 0 & 0 & 0 & 0 & 0 \end{bmatrix}$                                                                                                                             |
| $\frac{\partial^2 m_{12}}{\partial \mathbf{x}_j^2} \Big _{\mathbf{x}_j = \mathbf{x}_0}$ | = | $\begin{bmatrix} -4k_{21} - 4q_{12} & 2k_{11} + 2k_{22} + 2q_{11} + 2q_{22} - 4q_{33} & 2k_{32} + 6q_{23} & -2q_{34} & 0 & 0 \\ 2k_{11} + 2k_{22} + 2q_{11} + 2q_{22} - 4q_{33} & -4k_{12} - 4q_{12} & 2k_{31} + 6q_{13} & 0 & 2q_{34} & 0 \\ 2k_{32} + 6q_{23} & 2k_{31} + 6q_{13} & -4k_{12} - 4k_{21} - 16q_{12} & 2q_{14} & -2q_{24} & 0 \\ -2q_{34} & 0 & 2q_{14}, 0 & q_{44}, 0 & 0 & 0 \\ 0 & 2q_{34} & -2q_{24} & q_{44} & 0 & 0 \\ 0 & 0 & 0 & 0 & 0 & 0 \end{bmatrix}$ |
| $\frac{\partial^2 m_{13}}{\partial \mathbf{x}_j^2} \Big _{\mathbf{x}_j = \mathbf{x}_0}$ | = | $\begin{bmatrix} -4k_{31} - 4q_{13} & 2k_{23} + 6q_{23} & 2k_{11} + 2k_{33} + 2q_{11} - 4q_{22} + 2q_{33} & 2q_{24} & 0 & 0 \\ 2k_{23} + 6q_{23} & -4k_{13} - 4k_{31} - 16q_{13} & 2k_{21} + 6q_{12} & -2q_{14} & 0 & 2q_{34} \\ 2k_{11} + 2k_{33} + 2q_{11} - 4q_{22} + 2q_{33} & 2k_{21} + 6q_{12} & -4k_{13} - 4q_{13} & 0 & 0 & -2q_{24} \\ 2q_{24} & -2q_{14} & 0 & 0 & 0 & q_{44} \\ 0 & 0 & 0 & 0 & 0 & 0 \\ 0 & 2q_{34} & -2q_{24} & q_{44} & 0 & 0 \end{bmatrix}$       |
| $\frac{\partial^2 m_{22}}{\partial \mathbf{x}_j^2} \Big _{\mathbf{x}_j = \mathbf{x}_0}$ | = | $\begin{bmatrix} 8q_{33} - 8q_{22} - 8k_{22} & 4k_{12} + 4q_{12} & -8q_{13} & 0 & -4q_{34} & 0 \\ 4k_{12} + 4q_{12} & 0 & 4k_{32} + 4q_{23} & 0 & 0 & 0 \\ -8q_{13} & 4k_{32} + 4q_{23} & 8q_{11} - 8k_{22} - 8q_{22} & 0 & 4q_{14} & 0 \\ 0 & 0 & 0 & 0 & 0 & 0 \\ -4q_{34} & 0 & 4q_{14} & 0 & 2q_{44} & 0 \\ 0 & 0 & 0 & 0 & 0 & 0 \end{bmatrix}$                                                                                                                             |
| $\frac{\partial^2 m_{23}}{\partial \mathbf{x}_j^2} \Big _{\mathbf{x}_j = \mathbf{x}_0}$ | = | $\begin{bmatrix} -4k_{23} - 4k_{32} - 16q_{23} & 2k_{13} + 6q_{13} & 2k_{12} + 6q_{12} & 0 & 2q_{24} & -2q_{34} \\ 2k_{13} + 6q_{13} & -4k_{32} - 4q_{23} & 2k_{22} + 2k_{33} - 4q_{11} + 2q_{22} + 2q_{33} & 0 & -2q_{14} & 0 \\ 2k_{12} + 6q_{12} & 2k_{22} + 2k_{33} - 4q_{11} + 2q_{22} + 2q_{33} & -4k_{23} - 4q_{23} & 0 & 0 & 2q_{14} \\ 0 & 0 & 0 & 0 & 0 & 0 \\ 2q_{24} & -2q_{14} & 0 & 0 & 0 & q_{44} \\ -2q_{34} & 0 & 2q_{14} & 0 & q_{44} & 0 \end{bmatrix}$       |
| $\frac{\partial^2 m_{33}}{\partial \mathbf{x}_j^2} \Big _{\mathbf{x}_j = \mathbf{x}_0}$ | = | $\begin{bmatrix} 8q_{22} - 8k_{33} - 8q_{33} & -8q_{12} & 4k_{13} + 4q_{13} & 0 & 0 & 4q_{24} \\ -8q_{12} & 8q_{11} - 8k_{33} - 8q_{33} & 4k_{23} + 4q_{23} & 0 & 0 & -4q_{14} \\ 4k_{13} + 4q_{13} & 4k_{23} + 4q_{23} & 0 & 0 & 0 & 0 \\ 0 & 0 & 0 & 0 & 0 & 0 \\ 0 & 0 & 0 & 0 & 0 & 0 \\ 4q_{24} & -4q_{14} & 0 & 0 & 0 & 2q_{44} \end{bmatrix}$                                                                                                                             |

Table 3.  $\frac{\partial^2 m_{ef}}{\partial \mathbf{x}_j^2}$  at  $\mathbf{x}_j = \mathbf{x}_0$ .
